# Supplementary material for: Fine-tuning non-covalent interactions between hybrid metal-oxo clusters and proteins
Source: Royal Society of Chemistry journal article supplement (doi:10.1039/d2fd00161f), 2022-11-29
Supplement: d2fd00161f1.pdf [file d2fd00161f1.pdf]

## Supplementary Information

# Fine-tuning non-covalent interactions between hybrid metal-oxo clusters and proteins

*Sarah Lentink, David E. Salazar Marcano, Mhamad Aly Moussawi, Laurens Vandebroek, Luc Van Meervelt and Tatjana N. Parac-Vogt\**

Department of Chemistry, KU Leuven, Celestijnenlaan 200F, 3001 Leuven, Belgium

\*E-mail: [tatjana.vogt@kuleuven.be](mailto:tatjana.vogt@kuleuven.be) ; Tel: +32 (0)16 327612

## Table of Contents

|                                       |   |
|---------------------------------------|---|
| NMR.....                              | 3 |
| Fluorescence Emission Spectra.....    | 4 |
| Single crystal X-ray structures ..... | 7 |

## NMR

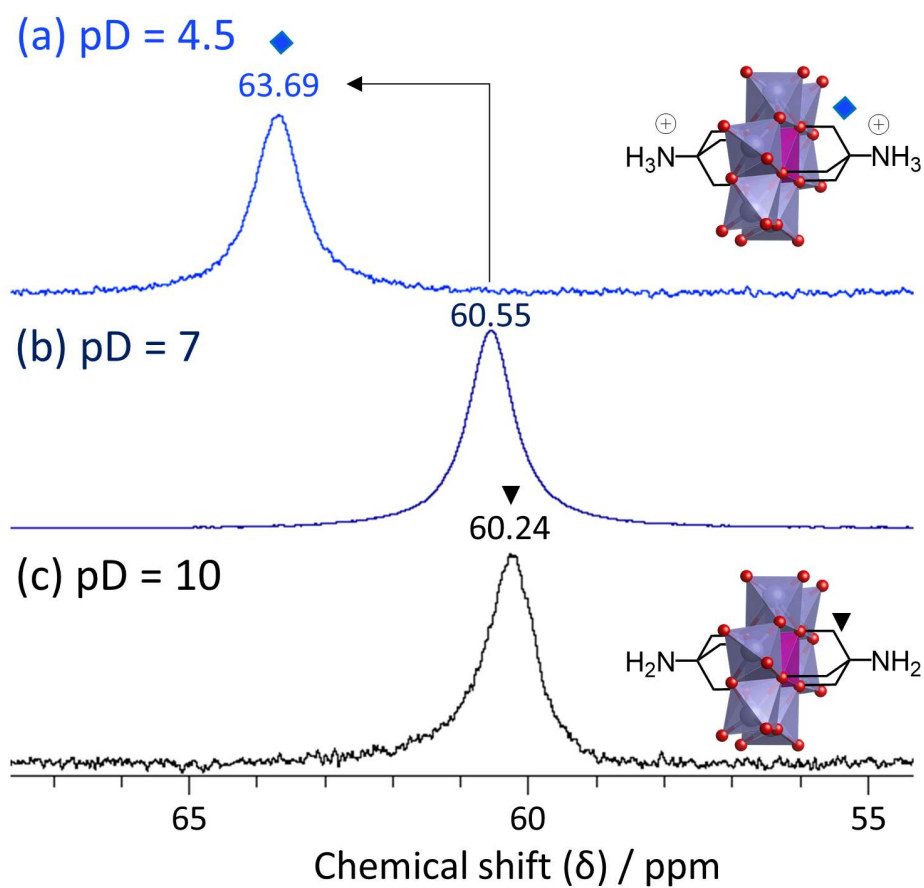

**Figure S1** (a)  $^1\text{H}$  NMR spectra of AE-NH<sub>2</sub> in (a) 100 mM acetate buffer at pD 4.5, (b) D<sub>2</sub>O at pD 7 and (c) 100 mM carbonate buffer at pD 10 showing the peak corresponding to the paramagnetically deshielded -OCH<sub>2</sub>- groups bound to the POM.

## Fluorescence Emission Spectra

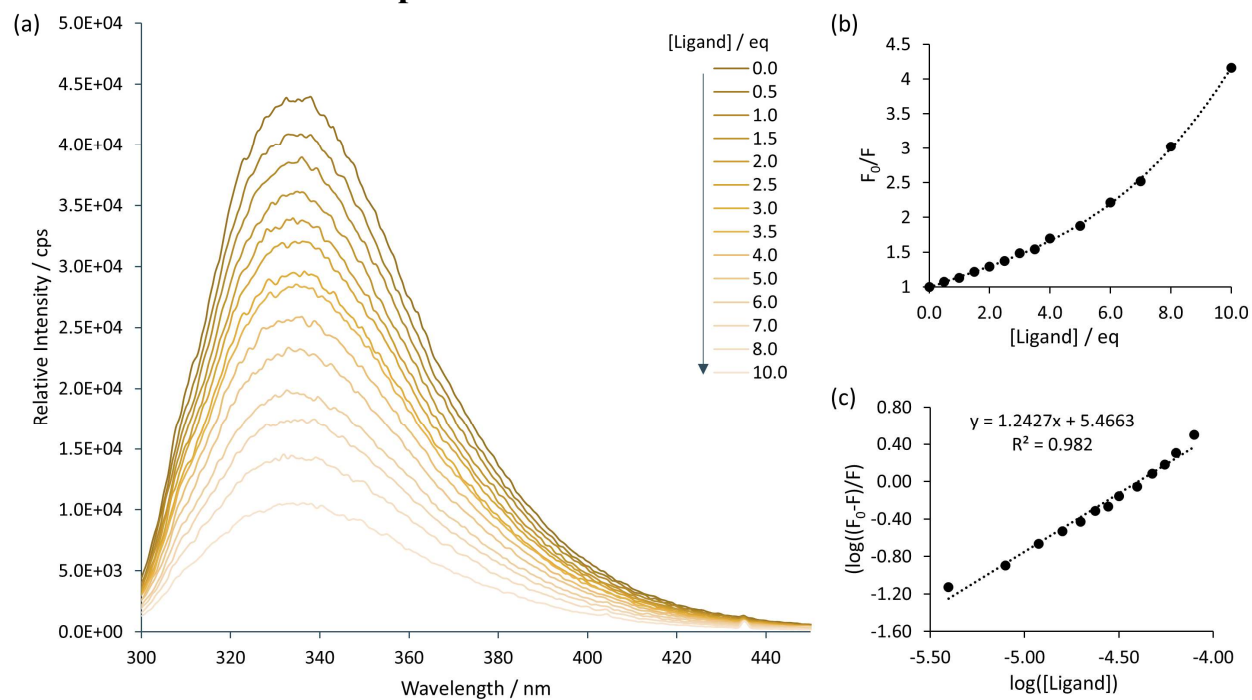

**Figure S2** (a) Fluorescence emission spectra of 8  $\mu\text{M}$  HEWL in PBS(1X) buffer at pH 7.4 with increasing amounts of AE-Biot (0 – 10 eq). (b) Stern-Volmer and (c) derived Stern-Volmer plots.

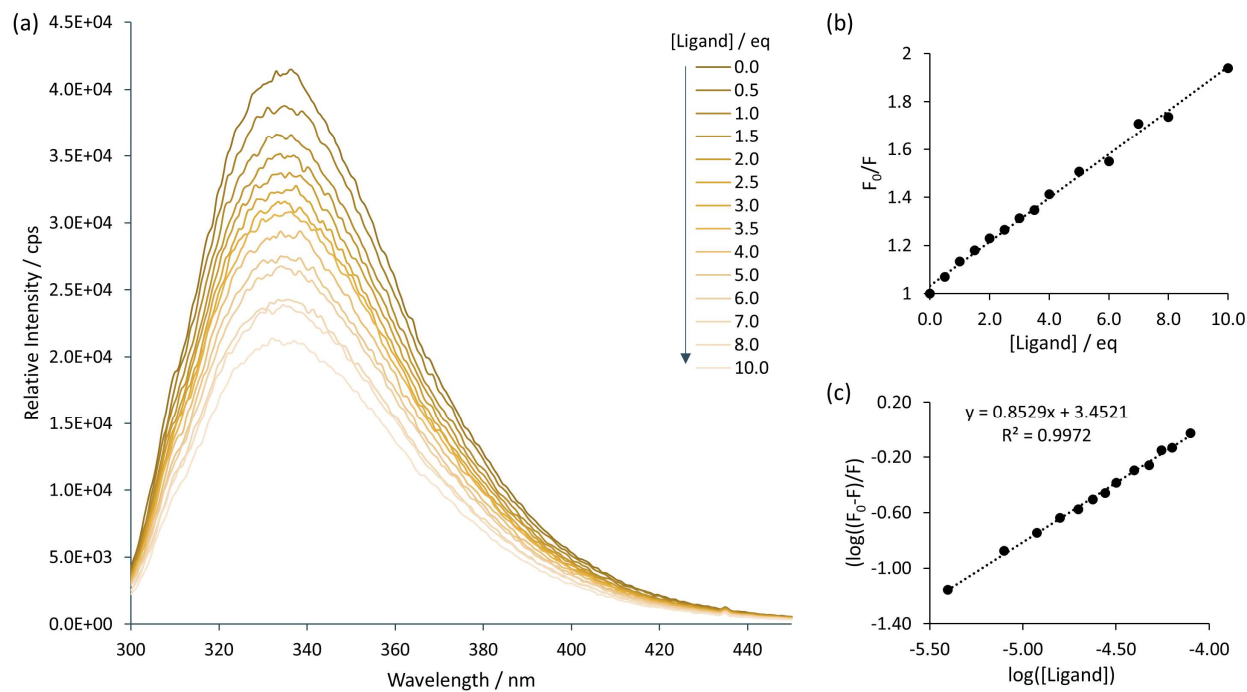

**Figure S3** (a) Fluorescence emission spectra of 8  $\mu\text{M}$  HEWL in PBS(1X) buffer at pH 7.4 with increasing amounts of AE-NH<sub>2</sub> (0 – 10 eq). (b) Stern-Volmer and (c) derived Stern-Volmer plots.

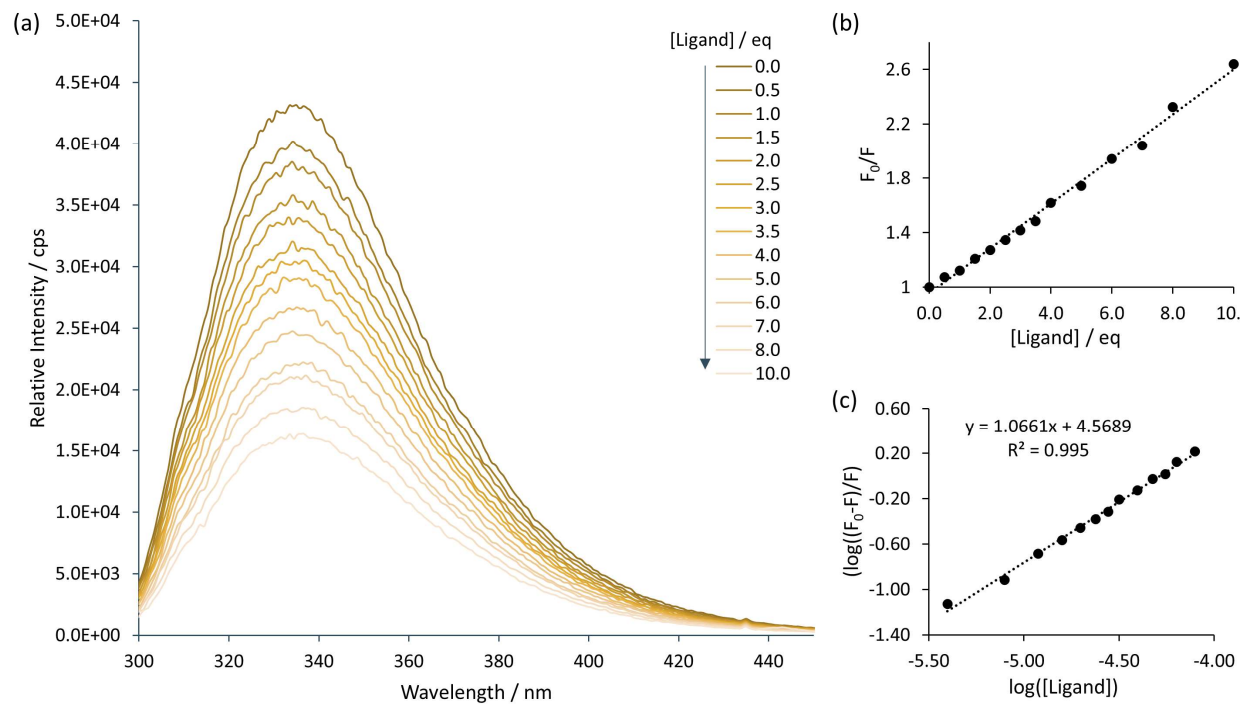

**Figure S4** (a) Fluorescence emission spectra of 8 μM HEWL in PBS(1X) buffer at pH 7.4 with increasing amounts of AE-CH<sub>3</sub> (0 – 10 eq). (b) Stern-Volmer and (c) derived Stern-Volmer plots.

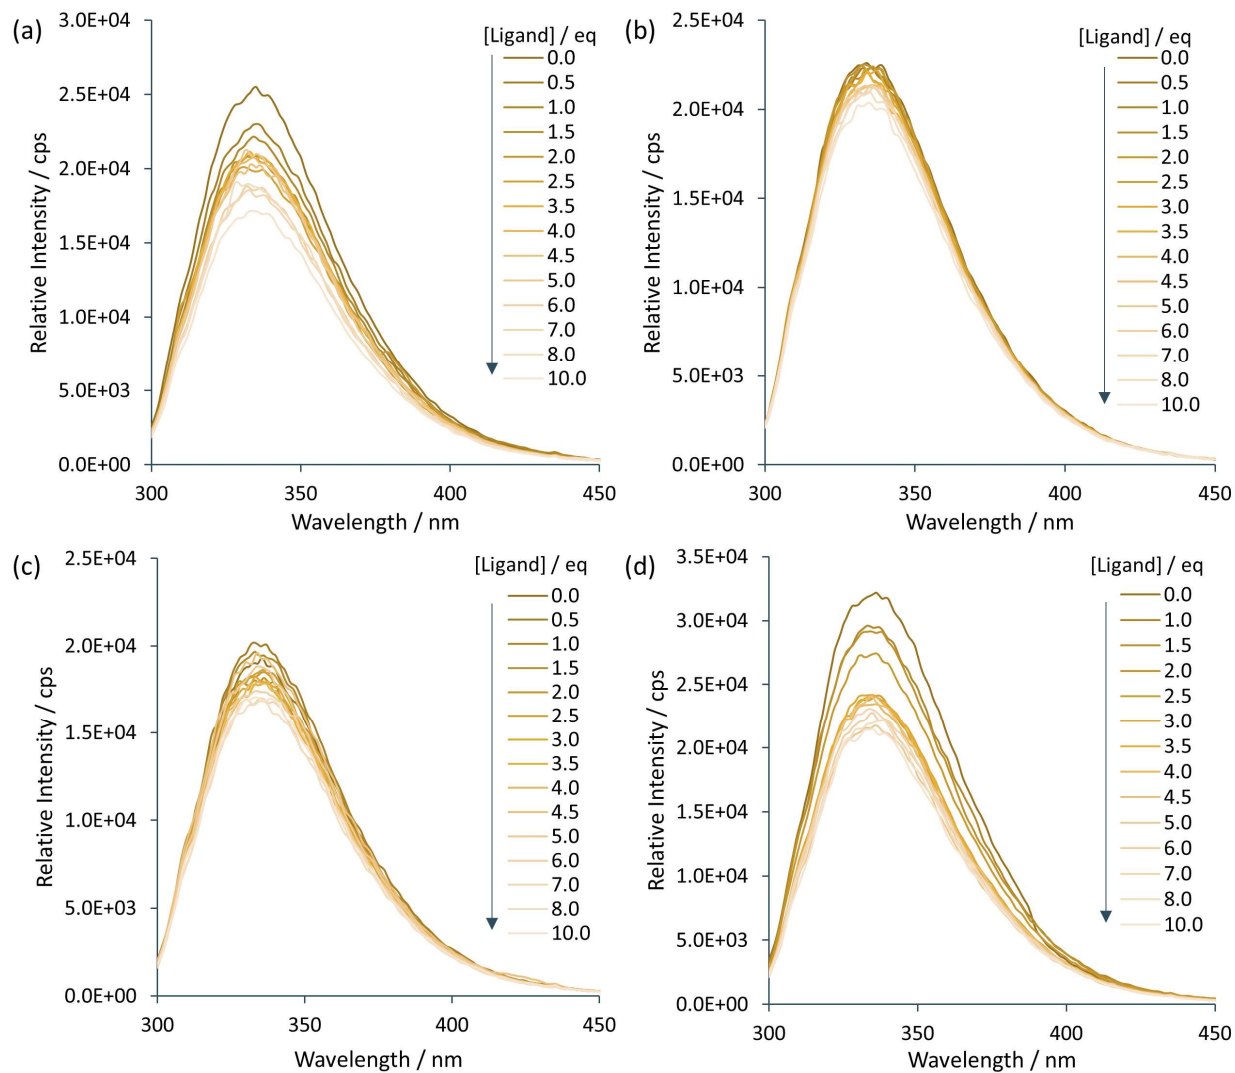

**Figure S5** (a) Fluorescence emission spectra of 8  $\mu\text{M}$  HEWL in PBS(1X) buffer at pH 7.4 with increasing amounts of (a) AE(Al), (b) biotin, (c) Tris-NH<sub>2</sub>, (d) Tris-CH<sub>3</sub> (0 – 10 eq).

## Single crystal X-ray structures

**Table S1** Data collection and refinement statistics for the co-crystals of HEWL/AE–Biot, HEWL/AE-NH<sub>2</sub> and HEWL/AE-CH<sub>3</sub> (A and B).

| Parameter                                               | Value                                    |                                          |                                          |                                          |
|---------------------------------------------------------|------------------------------------------|------------------------------------------|------------------------------------------|------------------------------------------|
| Co-crystal                                              | HEWL/AE-Biot                             | HEWL/AE-NH <sub>2</sub>                  | HEWL/AE-CH <sub>3</sub> (A)              | HEWL/AE-CH <sub>3</sub> (B)              |
| PDB deposition code                                     |                                          |                                          |                                          |                                          |
| Space group                                             | <i>P</i> 4 <sub>3</sub> 2 <sub>1</sub> 2 |
| Unit cell dimensions [Å]                                | <i>a</i> = 79.39                         | <i>a</i> = 76.61                         | <i>a</i> = 76.39                         | <i>a</i> = 75.94                         |
|                                                         | <i>b</i> = 79.39                         | <i>b</i> = 76.61                         | <i>b</i> = 76.39                         | <i>b</i> = 75.94                         |
|                                                         | <i>c</i> = 35.14                         | <i>c</i> = 37.10                         | <i>c</i> = 36.98                         | <i>c</i> = 36.76                         |
| Resolution range [Å]                                    | 79.39-2.34                               | 38.30-1.57                               | 38.19-1.24                               | 37.97-1.47                               |
|                                                         | (2.42-2.34) <sup>[a]</sup>               | (1.60-1.57) <sup>[a]</sup>               | (1.26-1.24) <sup>[a]</sup>               | (1.50-1.47) <sup>[a]</sup>               |
| R <sub>merge</sub> [%]                                  | 8.6 (66.2) <sup>[a]</sup>                | 7.2 (79.9) <sup>[a]</sup>                | 5.7 (76.4) <sup>[a]</sup>                | 7.3 (77.0) <sup>[a]</sup>                |
| <I/σ>                                                   | 21.4 (2.4) <sup>[a]</sup>                | 24.0 (4.4) <sup>[a]</sup>                | 28.4 (4.7) <sup>[a]</sup>                | 24.7 (4.7) <sup>[a]</sup>                |
| No. of unique reflections                               | 5101 (467) <sup>[a]</sup>                | 15989 (768) <sup>[a]</sup>               | 31633 (1519) <sup>[a]</sup>              | 18885 (908) <sup>[a]</sup>               |
| Multiplicity                                            | 19.4 (8.9) <sup>[a]</sup>                | 24.0 (23.3) <sup>[a]</sup>               | 24.3 (24.0) <sup>[a]</sup>               | 24.3 (24.1) <sup>[a]</sup>               |
| Completeness [%]                                        | 100.0 (99.8) <sup>[a]</sup>              | 100.0 (100.0) <sup>[a]</sup>             | 100.0 (100.0) <sup>[a]</sup>             | 100.0 (100.0) <sup>[a]</sup>             |
| R <sub>work</sub> /R <sub>free</sub> <sup>[b]</sup> [%] | 25.1/27.8                                | 19.1/23.2                                | 14.41/16.71                              | 17.1/20.2                                |
| RMSD from ideal                                         |                                          |                                          |                                          |                                          |
| Average isotropic B factors [Å <sup>2</sup> ]           | 51.83                                    | 25.45                                    | 20.28                                    | 22.89                                    |
| No. of water molecules                                  | 15                                       | 75                                       | 154                                      | 82                                       |
| Ramachandran plot [%]                                   |                                          |                                          |                                          |                                          |
| Residues in favoured regions                            | 90.55                                    | 96.85                                    | 99.21                                    | 98.43                                    |
| Outliers                                                | 0.00                                     | 0.00                                     | 0.00                                     | 0.00                                     |

[a] values in parentheses are for the highest resolution shell. [b] R<sub>free</sub> is calculated using a random 5 % of data excluded from the refinement.

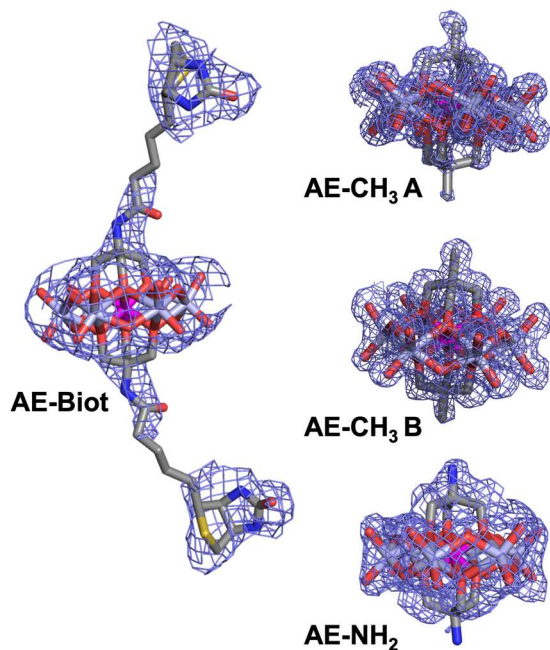

**Figure S6** Fit of the HPOMs in the  $2F_0-F_C$  electron density map (shown as blue mesh) and contoured at 1.0 r.m.s.d.

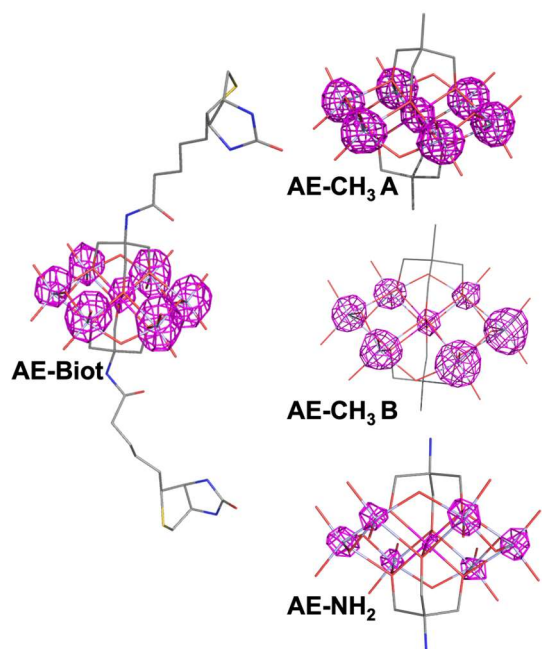

**Figure S7** Anomalous difference map of the HPOMs shown as a magenta mesh and contoured at 5.0 r.m.s.d for AE-Biot, AE-CH<sub>3</sub> A and AE-NH<sub>2</sub>, and 3.0 r.m.s.d for AE-CH<sub>3</sub> B.



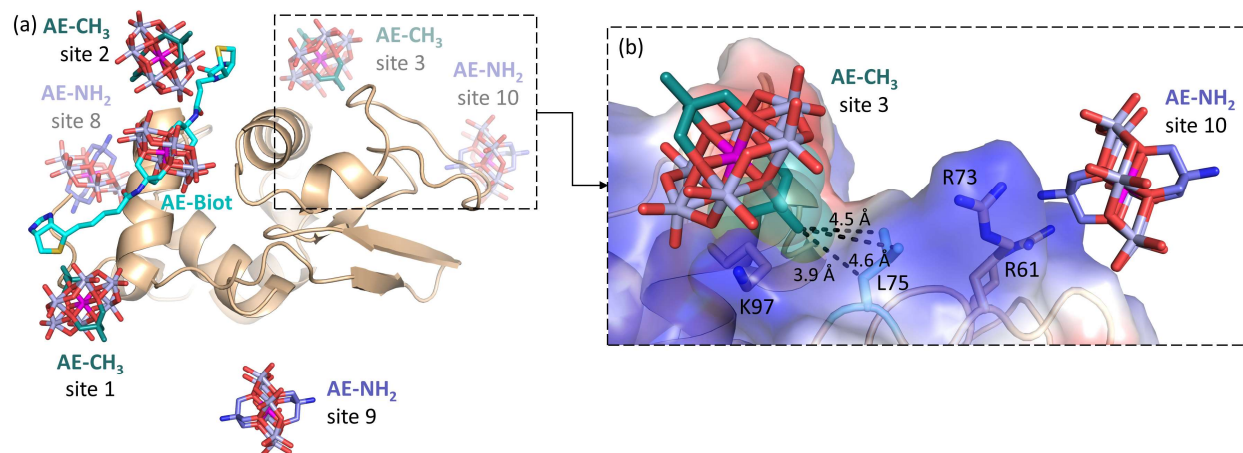

**Figure S8** (a) Superposition of the co-crystal structures showing the HPOM binding sites for HEWL/AE-Biot, HEWL/AE-NH<sub>2</sub> and HEWL/AE-CH<sub>3</sub>. (b) Close-up of AE-CH<sub>3</sub> binding site 3 and AE-NH<sub>2</sub> binding site 10, showing the shortest distances between the -CH<sub>3</sub> carbon of AE-CH<sub>3</sub> and residue Leu75 in black (3.9-4.6 Å), the Van der Waals radius of the C atoms in the Tris-CH<sub>3</sub> ligand as teal spheres, and the protein electrostatic surface charge: blue is positive, white is neutral, and red is negative.
